# Supplementary material for: 3D printing of tough hydrogels based on metal coordination with a two-step crosslinking strategy
Source: Royal Society of Chemistry journal article supplement (doi:10.1039/d1tb02529e), 2022-01-01
Supplement: d1tb02529e2.pdf [file d1tb02529e2.pdf]

### Supplementary Information

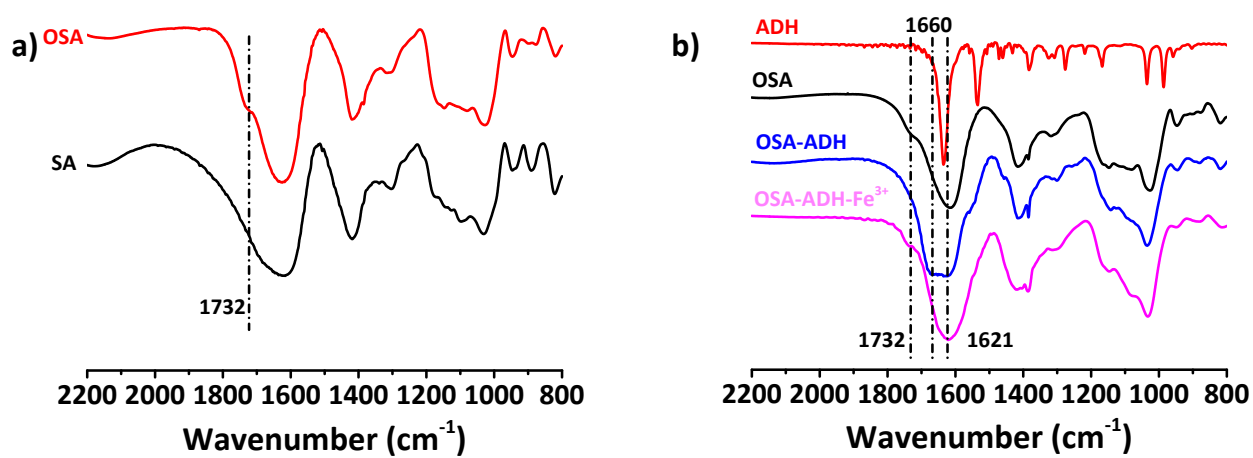

**Figure S1.** (a) FTIR spectra of SA and OSA. (b) FTIR spectra of OSA, ADH, OSA-ADH gel, and OSA-ADH-Fe<sup>3+</sup> gel.

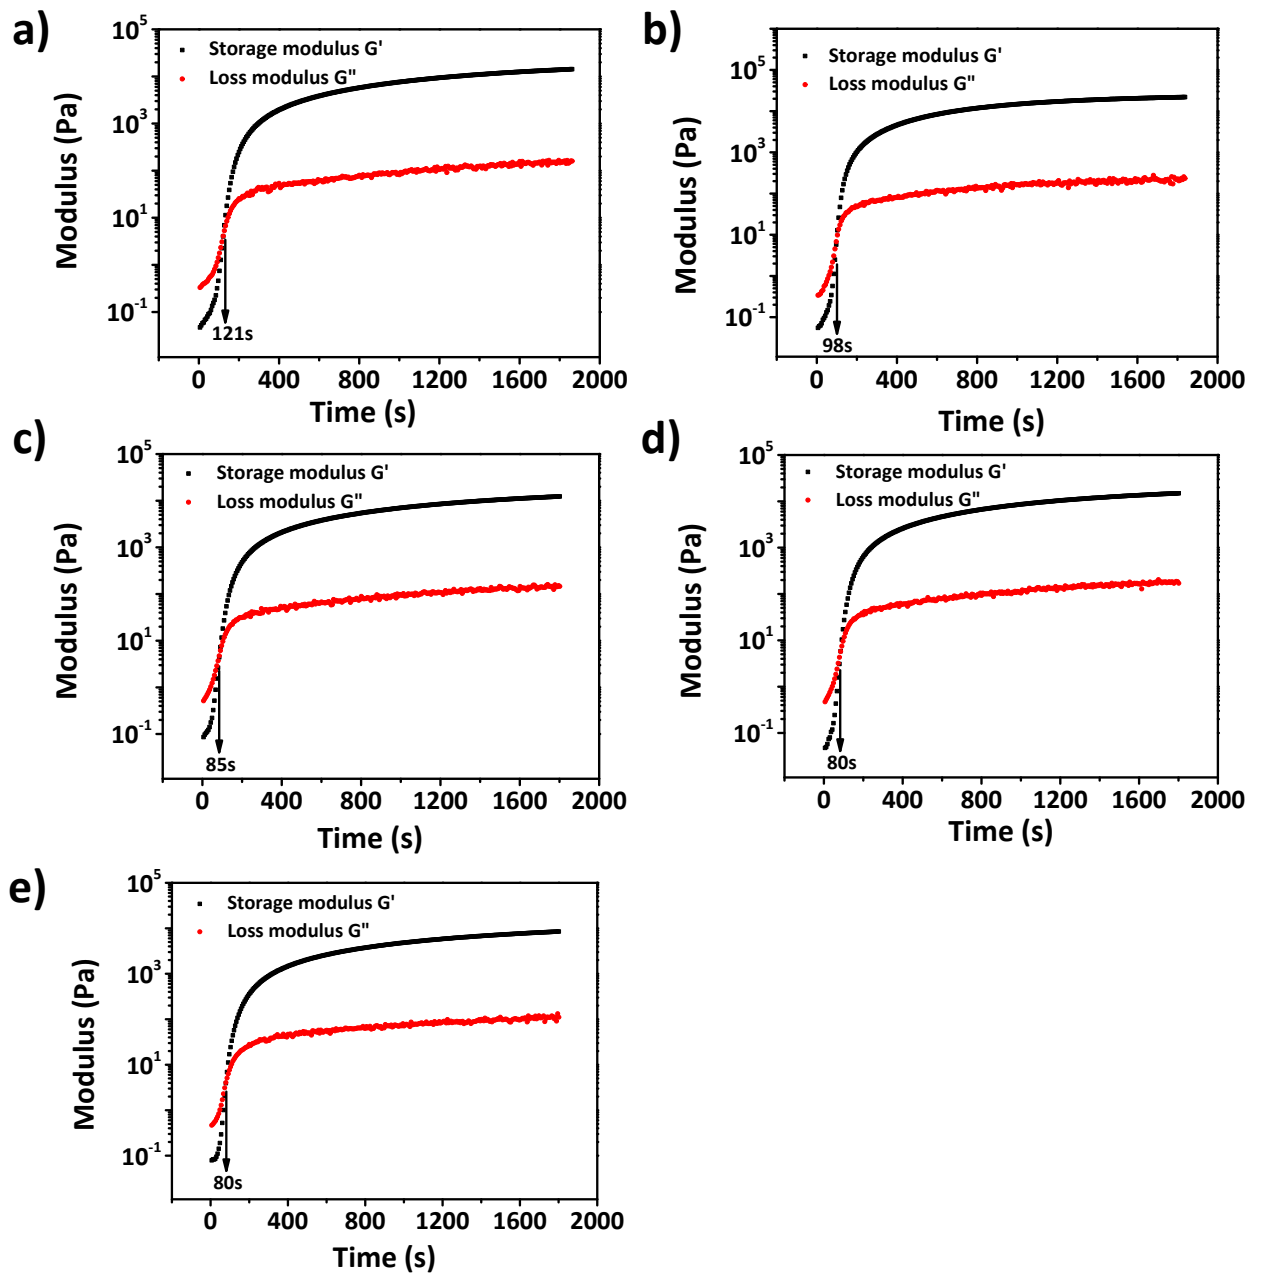

**Figure S2.** Time-sweep rheological properties of OSA-ADH gel during the gelation process with different weight ratios of OSA to ADH, (a) 1:0.35; (b) 1:0.39; (c) 1:0.44; (d) 1:0.48; (e) 1:0.52.

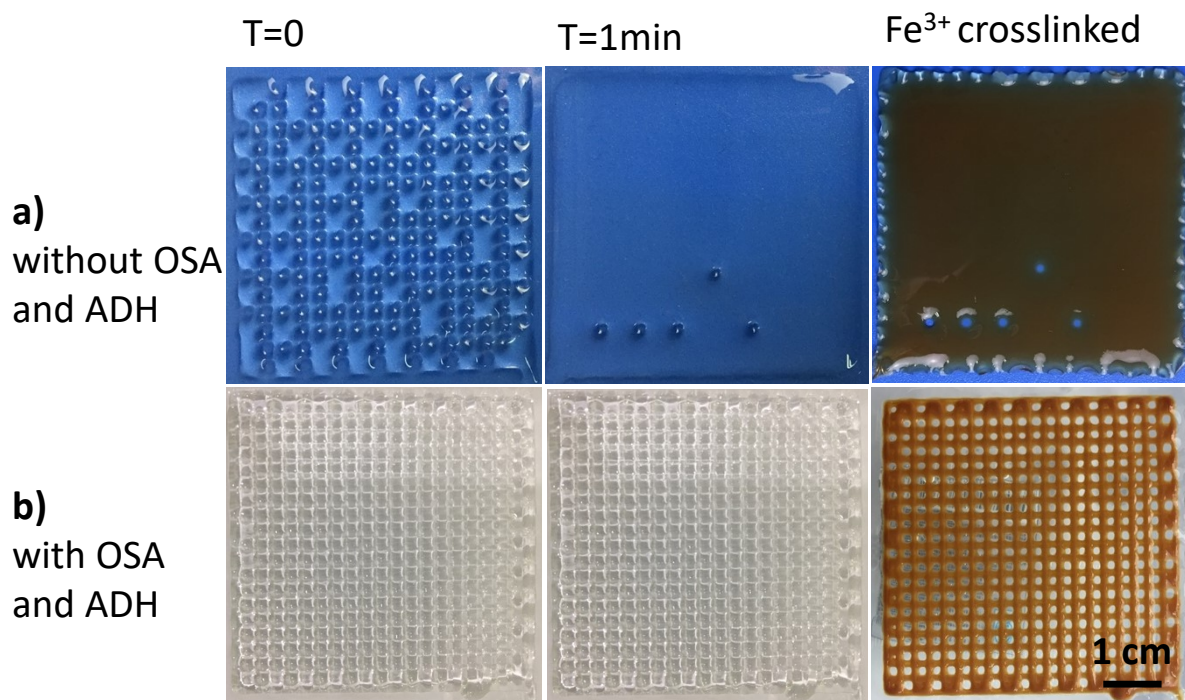

**Figure S3.** Printing results of P(AAm-co-AAc) polymer solution (a) without and (b) with OSA and ADH.

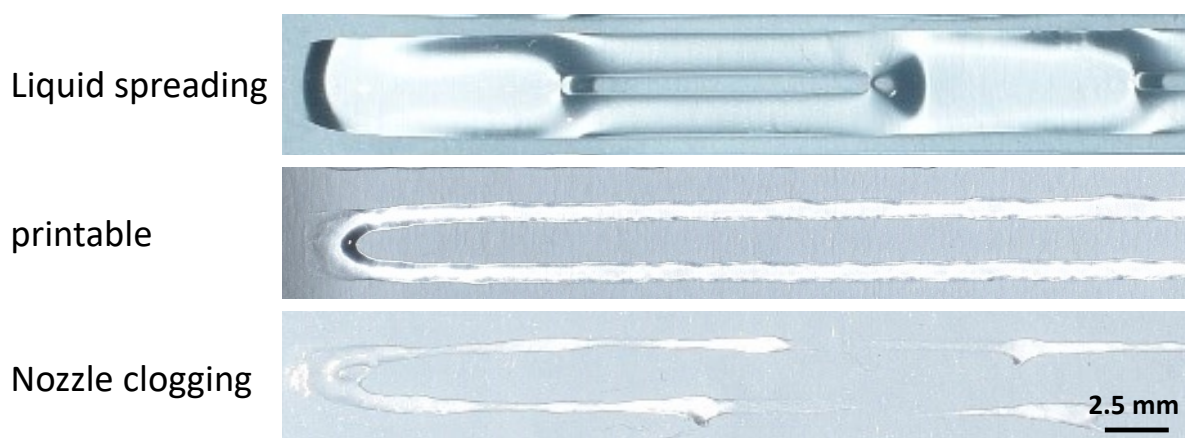

**Figure S4.** Different printing status of the ink.
